# Supplementary material
Source: Elsevier journal article supplement (https://drewscherer.angelfire.com/MMC03.pdf)

# The Fairport Herald-Mail

36 West Ave., Fairport, Monroe Co., N.Y.  
Herald Established 1872, Mail Established 1881, Consolidated May, 1925  
Published Every Thursday By Empire State Weeklies

GLENN W. GAZLEY, Editor and Publisher  
MARGARET A. ELLSWORTH, News Editor  
J. DAVID BAKER, Staff Photographer  
CARRIE WILLIAMS BUGS, Editor Emeritus

## EMPIRE STATE WEEKLIES

G. CURTIS GERLING, Pres.

Member New York Press Association and National Editorial Association  
Official Newspaper for Village of Fairport and Towns of Perinton and Penfield

Advertising rate card submitted on request.

\$3.00 per year (In Canada \$3.25);

six months \$1.75; single copy 8 cents

Entered at the Post Office at Fairport, N.Y.

as second-class mail matter.

EXCLUSIVE NATIONAL ADVERTISING REPRESENTATIVE **Greater Weeklies**  
New York — Chicago — Detroit — Philadelphia

### Support Your Hometown Business Firms

No matter whether you are in need of food, a new or used car, a home, insurance, poultry or stock supplies, lumber, paint, farm equipment, clothing, cameras, drugs or a thousand other items, your hometown business man can supply your needs.

Now that summer is really with us, you'll need warm weather items of many kinds. Whether you're going to the lake, seashore or the mountains, your local business firm has everything you need for the trip.

As always, trading in your hometown will save you both time and effort. You're practically certain to find just what you'll need here, and thus avoid a costly shopping expedition, far afield.

Your lasting satisfaction with every purchase you make in your local places of business is their first consideration. They pride themselves on wide selections of the newest and best in both merchandise and services. . . and on keeping prices down to the levels you'll find anywhere. Want proof? It's waiting for you right here in your own village. . . right now!

Your hometown business man supports all worthy civic projects when called upon. Why not support him? The next time you're considering a purchase of any kind, see your friendly hometown businessman first.

### Victor Players Staging Events

Production costs will rear their heads and to help meet them the Victor Community Players are planning a bit of entertainment prior to starting work on a fall production.

Friday, July 15 will see a card party held at the home of Miss Elizabeth Osborne on Maple Ave. Victor.

An evening of dancing, at the Victor Town Hall, to the wonderful music of Cal Brown's Masters is scheduled for Friday, July 29.

Everyone is urged to come by the Victor Players and have a good time at both events. Your support will be appreciated.

## Letters to the Editor

Washburn, Maine  
June 27, 1955

Fairport Herald Mail  
West Ave.  
Fairport, N. Y.  
Dear Sirs:

This is to inform you that my address has been changed. I have resigned the pastorate of the First Pentecostal Church in Long Branch, N. J., effective June 19th. I have received a missionary appointment for Alaska. This Summer I am itinerating through Maine and later on through New York and New Jersey, in the interest of our prospective missionary work. Due to the continuous change of addresses, it will be next to impossible to keep up with us through the Summer. It would probably be the best to discontinue the paper until further notice.

Possibly you would be interested in running a story of our missionary appointment. The Long Branch Daily Record published quite an extensive article. If it were more accurate I would send you a copy. Some of it was quite mixed up. I expect to be in Fairport sometime, the latter part of the Summer and then possibly we can advise you of the story.

I want to take this opportunity to thank you for your kindness in sending the paper. Although I have been away from Fairport for some time, yet the town doesn't seem to get away from me. I really enjoy every department. I enter into the sports news as if I were back in school once again. I was certainly thrilled at the basketball team's accomplishments last winter. Another very interesting department is the news of 10 years ago and before. I wish this could be more elaborate. It brings back pleasant memories of the "good ole days." Keep up the good work with this fine paper. We hope to see you sometime this summer.

Sincerely yours,  
Rev. Paul E. Bills

Mr. Glenn W. Gazley  
Editor and Publisher  
Fairport Herald Mail  
Fairport, New York  
Dear Mr. Gazley:

Because of the interest in the excellent work being done in this community by Frank Dearborn Director of Recreation, I am enclosing a letter which I received telling of a contribution of similar caliber which he is making in the field of recreation in the County at large.

Although he is not required to do so, Mr. Dearborn has given generously of his leisure time and efforts to neighboring communities starting recreation programs, to the City of Rochester through the Council of Social Agencies, and more recently in connection with a training program and summer playground personnel.

It has given me real pleasure to hear the many compliments he has received, and I am sure there are many others who will feel the same.

The letter follows:

"Dear 'Bob':  
Just for the record, it seems to me, that you and others in Fairport who are interested in public recreation, should know of the fine contribution which Frank Dearborn and his staff made to our community-wide in-service training program. Frank's work was outstanding and several people commented to me about the fine staff which came from Fairport. So thanks to you and all of Fairport for the fine contribution which you are making to the recreation work in the entire community."

Sincerely yours,  
Rex M. Johnson, Sec.  
Recreation-Character Building Div.  
RHW/hh

Very truly yours,  
Robert H. Wagner

### Class of 1930 Has Reunion

The class of 1930 held its 25th reunion June 25, 1955 at the Monroe County Golf Club. A charcoal steak dinner was enjoyed by 45 class members, their wives or husbands. When the roll was called 26 members of the 58 of the class were present. Five have passed away. Letters and notes from many who could not attend were read, some hoping that they would be able to join the next reunion.

David Hodgson acted as Master of Ceremonies, and all found that Dave had lost none of his pep and laughter of his school days.

Those attending were Mrs. Robert Willowghy from Warren, Ohio. (Evelyn Scheumaker); Mr. and Mrs. Harry Scheumaker, Woodtown, N. J.; Wayland Hare, Buffalo; Mr. and Mrs. Paul Gears, Rochester. (Esther Murphy); Dr. and Mrs. Carl DeSando, Rochester. (Marie Notebaert); Mr. and Mrs. Jack Taber, Lockport. (Lucille Martin);

From Fairport and vicinity were Mr. and Mrs. David Hodgson; Mr. and Mrs. Francis Green. (Lauretta Lawler); Mr. and Mrs. Ralph Burrus. (Helena Clancy); Mr. and Mrs. Harry Graff. (Thelma Donk); Mr. and Mrs. Claude Emery; Mr. and Mrs. Donald Osterander; Mr. and Mrs. John Parks; Mr. and Mrs. Carlton Elliott; Mr. and Mrs. N. J. Mancuso. (Irene DeCoca); Mr. and Mrs. Dick Cross. (Mary Monihan); Mr. and Mrs. Clarence Bulman. (Mary Sampson); Mrs. Edward Carney (Betty Crowley); Carl Burlington; William Bolton; Esther Kisby; Kathryn O'Leary; and Mrs. Florence Pybrom (Florence Lucas).

It was voted that another reunion would be held in five years. All those present wish to thank everyone who worked on this reunion to make it such a success. All are looking forward to meeting those who were absent this year in 1960.

To the Editor  
Fairport Herald Mail  
Dear Sir:

On June 14, 1955, the Village Board held a hearing in connection with the construction of sidewalks in the vicinity of the new elementary school. Many interested residents of the Village attended and expressed their views in this connection and although the opinions were quite varied it did appear that the most repeated opinion was that the map showing the location of the school population should be brought up to date and that then a comprehensive study should be made so as to determine the natural flow of pedestrian traffic to and from school. It seemed also to be the most prevalent view that after a thorough study had been made that the Village Board should order sidewalks to be constructed wherever necessary for the safe travel of the children to and from school. The June 16th issue of your paper correctly reported that the "Village Board members indicated they would probably stand by a resolution adopted by the previous board on July 1954, which gave a September 15 deadline for residents of Potter Place, Lewis Street, James Street, Miles Avenue, and Dewey Avenue to have sidewalks installed", and also that the area sidewalk proposition was referred to the Sidewalk Committee, consisting of Trustees Peter Prozeller and William Ward, for further investigation and to report at the July 6th meeting.

The June 23rd issue of your paper incorrectly reported that the Sidewalk Committee had reported and recommended:

1. To rescind the 1954 resolution with reference to the construction of sidewalks on the south side of Lewis Street, the east side of Potter Place, the north and south sides of James Street and the east side of Potter Place, the north and south sides of James Street and the east and west sides of Miles Avenue Extension.
2. To extend both the present sidewalks on the east and west sides of Hulbert Avenue to James Street.
3. To authorize sidewalks on the south side of James Street only, from Hulbert Avenue to Potter Place.
4. To extend the sidewalks on the east and west sides of Miles Avenue to James Street.

There were also several other claimed recommendations. It must be definitely and positively brought to the attention of the residents of Fairport that the above report and recommendation did not come from the Sidewalk Committee, and it was not the recommendation of that Committee. The school map was not brought up to date as recommended and a complete and thorough study as to the probable avenues of pedestrian traffic was not made. The report expressed the views of Mr. Prozeller alone and not concurred in by the other member of the Committee, therefore it cannot be considered as the report of the Sidewalk Committee. The resolution which was adopted, upon the claimed report of the Sidewalk Committee, was adopted by a vote of Mr. Prozeller, Mr. Murphy and Mr. Stauber for the resolution and Mr. Ward and Mr. Malcolm voting against it.

We feel that the matter of the placement of Sidewalks is not to be passed over lightly and should seriously arouse the interest and concern of every parent and citizen of this Community. The safety of our children should be

the prime and only consideration by which we should be guided.

We wish to point out the many children from Roselawn Avenue, Nelson Street, Clifford Street, Galusha Street, Fourth Avenue, Fifth Avenue, Woodlawn Avenue, West Street, Cole Street, Prospect Street, West Avenue, West Church Street, Hulbert Avenue, Briggs Avenue, Miles Avenue, Dewey Avenue, and Potter Place to James Street and there to find no sidewalks on the north side of the street but in order to continue their journey to school they must then cross the travelled portion of James Street to the sidewalks on the south side of the street. We might point out in passing that James Street is of some length and vehicles have been known to travel the street at considerable speed. We cannot in good conscience recommend the plan adopted by the majority of the Board and therefore after due consideration and with the matter of the safety of our children as the only motivating factor we recommend the following:

1. That sidewalks be constructed on the south side of Lewis Street, the east side of Potter Place from Lewis Street to the school property, the north and south sides of James Street, the east and west sides of Miles Avenue Extension and to extend the present walks on Hulbert Avenue to James Street.
2. That the affected property owners be given until November 1st to install the sidewalks.
3. That special consideration be given where hardships may be involved.

We are aware of the fact that the sidewalk on the east side of Potter Place will cost the Village at large \$5500.00. This is the price of the lowest bidder. We feel, and when the need for sidewalks arises, that the cost to the Village will be more. The fact that the dirt taken from the street can be used for excavation purposes now will not be available at a later date. This would add to the cost of the sidewalks.

Again may be say we feel that the safety of 1200 children going to and from school either by bus, by bicycle or by foot, is our first and foremost consideration. Thanking you for the space in your paper, we remain,  
Yours very truly,  
Donald P. Malcolm,  
Member of Village Board  
Member of Finance Committee  
William G. Ward  
Member of Village Board  
Member of Sidewalk Committee

EDITOR'S NOTE: Just for the record—the June 23rd issue of this paper did not report incorrectly the recommendations of the sidewalk committee. The column appeared under the by-line of Peter J. Prozeller, chairman of the sidewalk committee, and the report should be attributed solely to the author who so identified himself.

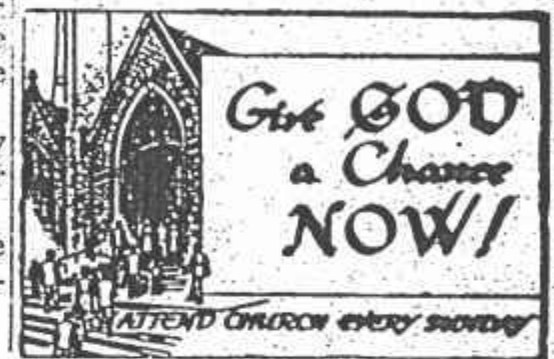

### Come Get Our Deal

ON A NEW

## HUDSON

### HORNET - WASP - RAMBLER

40 YEARS YOUR LOCAL DEALER

PERSONALLY INDORSED

### GOOD USED CARS

- 1953 Hudson Super Wasp 4 door sedan \$1195  
With Radio. Only 16,000 Miles
- 1952 Hudson Commodore or Wasp sedan \$895  
Low Mileage. Very Clean. Locally owned.
- 1951 Hudson Commodore sd. \$695  
New Nylon tires. Very Nice.
- 1950 Hudson 2 door sedan \$450  
Clean and Good
- 1950 Nash Statesman sedan \$450
- 1950 Ford Custom 4 door \$525  
Very Clean

### SCHAUFELBERGER BROS.

HARLAND A. HOFER

Penfield, Four Corners

Tel. E. R. 415-J

## Make Your Back Yard A GARDEN SPOT!

get rid of garbage and trash cans with a new

## DUO-THERM

automatic GAS incinerator!

No matter how much work you do, your yard can't look the way you want it to if you allow unsightly garbage and trash cans to mar it's beauty. A new DUE-THERM GAS incinerator costs so little, yet serves in so many ways it is truly the most modern new appliance in years. Put an end to those trips out to a garbage can that's either frozen (all winter) or smelly and unattractive (all summer). Call your RG&E TODAY!

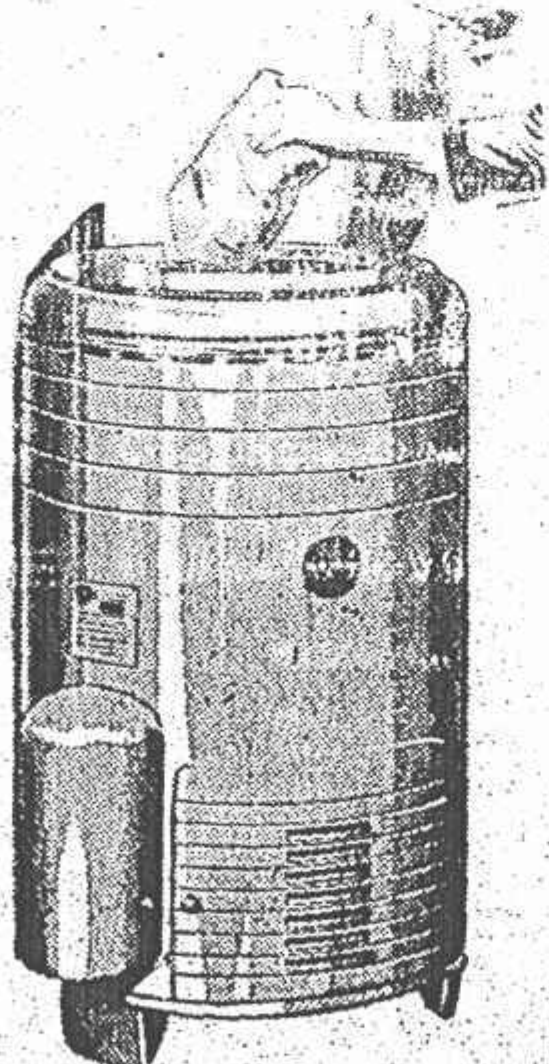

ONLY \$144.95 installed  
as little as \$1.50 a week.

- Turns on from pilot and shuts off automatically.
- Burns everything burnable—trash, boxes, leather, etc.
- Helps rid property of insects, gnats and other pests.
- Operates on economical GAS, (either natural or manufactured.)

CALL YOUR LOCAL RG&E REPRESENTATIVE

ROBERT S. COLE • ENTERPRISE 9277

EVENINGS • FAIRPORT 227J

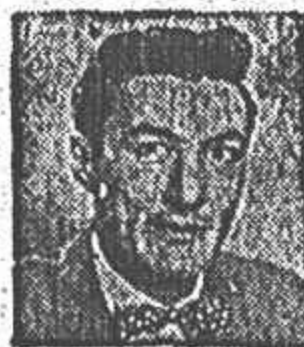

ALWAYS AT

YOUR SERVICE

ROCHESTER GAS

RG&E

and ELECTRIC

### SEMI ANNUAL CONDENSED STATEMENT

of the

## East Rochester Federal Savings & Loan Association

of East Rochester, New York

as of June 30, 1955.

| Assets                                                    |                       | LIABILITIES                          |                       |
|-----------------------------------------------------------|-----------------------|--------------------------------------|-----------------------|
| First Mortgage Loans and other first liens on real estate | \$5,309,492.99        | Capitol                              | \$5,314,044.35        |
| Loans on Savings Accounts                                 | 47,383.50             | Advances from Federal Home Loan Bank | 285,125.00            |
| Other Loans                                               | 20,679.00             | Loans in Process                     | 77,648.84             |
| Real Estate Sold on Contract                              | 9,162.18              | Other Liabilities                    | 3,940.41              |
| Investments and Securities                                | 410,840.00            | Specific Reserves                    | 6,825.46              |
| Cash on Hand and in Banks                                 | 290,135.21            | General Reserves                     | 396,109.21            |
| Office Building & Equipment Less Depreciation             | 66,243.13             | Surplus                              | 93,080.68             |
| Deferred Charges and other Assets                         | 2,837.94              |                                      | 489,189.89            |
| <b>TOTAL ASSETS</b>                                       | <b>\$6,156,773.95</b> | <b>TOTAL LIABILITIES</b>             | <b>\$6,156,773.95</b> |

CURRENT DIVIDEND RATE 2 1/2% — SYSTEMATIC SAVINGS — 1% ADDITIONAL

WHERE YOUR SAVINGS EARN MORE THAN THE AVERAGE!

JACOB PEMBROKE, Chairman of the Board

WALTER HILLMAN, President

GEORGE L. WIMER, Executive vice President and Manager

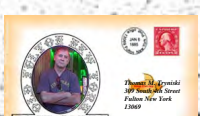

Supplement: MMC03 [file MMC03.pdf]
